# Supplementary material
Source: HighWire-hosted journal article supplement (https://erj.ersjournals.com/content/56/4/2003092)
Supplement: inline-supplementary-material-1 [file inline-supplementary-material-1.pdf]

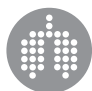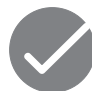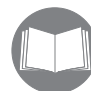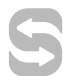

SHAREABLE PDF

# How can we better predict pulmonary blood clots in patients hospitalised for COVID-19?

Laurent Bertoletti <sup>1,2,3,4</sup> and Menno V. Huisman<sup>5</sup>

**Affiliations:** <sup>1</sup>Service de Médecine Vasculaire et Thérapeutique, CHU de St-Etienne, Saint-Etienne, France. <sup>2</sup>INSERM, UMR1059, Equipe Dysfonction Vasculaire et Hémostasie, Université Jean-Monnet, Saint-Etienne, France. <sup>3</sup>INSERM, CIC-1408, CHU Saint-Etienne, Saint-Etienne, France. <sup>4</sup>F-CRIN INNOVTE network, Saint-Etienne, France. <sup>5</sup>Dept of Thrombosis and Hemostasis, Leiden University Medical Center, Leiden, The Netherlands.

**Correspondence:** Menno V. Huisman, Dept of Thrombosis and Hemostasis, Leiden University Medical Center, Leiden, Albinusdreef 2, 2333ZA Leiden, The Netherlands. E-mail: m.v.huisman@lumc.nl

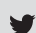

@ERSpublications

**D-dimer threshold at 2590 ng·mL<sup>-1</sup> is able to predict pulmonary embolism in COVID-19 patients with clinical deterioration** <https://bit.ly/3kYObc3>

**Cite this article as:** Bertoletti L, Huisman MV. How can we better predict pulmonary blood clots in patients hospitalised for COVID-19? *Eur Respir J* 2020; 56: 2003092 [<https://doi.org/10.1183/13993003.03092-2020>].

This single-page version can be shared freely online.

The emergence of coronavirus disease 2019 (COVID-19) has put pressure on health systems around the world [1, 2]. This coronavirus has also questioned much of our medical knowledge, with each day seeing the appearance of a new possible clinical expression of the virus [3]. Although its physiopathology is still poorly understood, the vascular tropism of the disease now seems to be a major pathway [4]. Recent studies highlight the development of a specific pulmonary vascular endothelialitis associated with thrombosis and angiogenesis [5].
